# Supplementary material
Source: PubMed Central journal article supplement (PMC4737938)
Supplement: ismej2015128x3.pdf [file ismej2015128x3.pdf]

**Table S1.** *Salinispora* strains and co-occurring bacteria used in this study. Coordinates (this study) or year of isolation are given for each strain, as well as sample depth if known. BC stands for Banco Chinchorro, which divided into North (N), Middle (M), and South (S) locations. \*Genome sequence available. †Strains used in secondary assays to determine the temporal onset of antagonism.

| #  | GenBank Accession # | Species (strain)                         | % BLAST ID | Isolation Site | Lat-Long Coordinates / Year of Isolation | Depth (m) |
|----|---------------------|------------------------------------------|------------|----------------|------------------------------------------|-----------|
| 1  | KJ746654            | <i>Salinispora arenicola</i> (CNY-679)*  | 100        | Dry Tortugas   | 24 40.165 N, 82 54.509 W                 | 20        |
| 2  | KJ746659            | <i>Salinispora arenicola</i> (CNY-680)   | 100        | Dry Tortugas   | 24 39.299 N, 82 55.319 W                 | 25        |
| 3  | KJ746655            | <i>Salinispora arenicola</i> (CNY-685)*  | 100        | BC (S)         | 18 24.373 N, 87 24.751 W                 | 10        |
| 4  | KJ746656            | <i>Salinispora arenicola</i> (CNY-694)*  | 100        | Cozumel        | 20 19.479 N, 87 01.627 W                 | 15        |
| 5  | KJ746657            | <i>Salinispora tropica</i> (CNY-678)*    | 100        | Cancun         | 21 10.262 N, 86 43.812 W                 | 12        |
| 6  | KJ746658            | <i>Salinispora tropica</i> (CNY-681)*    | 100        | Cozumel        | 20 19.479 N, 87 01.627 W                 | 15        |
| 7  | KJ746660            | <i>Salinispora tropica</i> (CNY-682)     | 100        | Cozumel        | 20 19.479 N, 87 01.627 W                 | 15        |
| 8  | KJ746661            | <i>Salinispora tropica</i> (CNY-684)     | 100        | Cozumel        | 20 19.479 N, 87 01.627 W                 | 15        |
| 9  | NC_009380           | <i>Salinispora tropica</i> (CNB-440)*†   | 100        | Bahamas        | 1989                                     | 20        |
| 10 | NZ_AZXH00000000     | <i>Salinispora tropica</i> (CNH-898)*†   | 100        | Bahamas        | 2000                                     |           |
| 11 | NZ_AUKS00000000     | <i>Salinispora tropica</i> (CNT-261)*†   | 100        | Bahamas        | 2007                                     | 700       |
| 12 | n/a                 | <i>Salinispora tropica</i> (CNT-283)†    | 100        | Bahamas        | 2007                                     | 13        |
| 13 | NZ_AZXE00000000     | <i>Salinispora tropica</i> (CNB-476)*†   | 100        | Bahamas        | 1989                                     | 20        |
| 14 | JHVV00000000        | <i>Salinispora tropica</i> (CNY-012)*†   | 100        | Bahamas        | 2010                                     | 8         |
| 15 | JHVW00000000        | <i>Salinispora tropica</i> (CNT-250)*†   | 100        | Bahamas        | 2007                                     | 12        |
| 16 | JN161822            | <i>Salinispora tropica</i> (CNR-699)*†   | 100        | Bahamas        | 2003                                     | 5         |
| 17 | NZ_AZWK00000000     | <i>Salinispora tropica</i> (CNS-197)*†   | 100        | Bahamas        | 2004                                     | 5         |
| 18 | NZ_AZXA00000000     | <i>Salinispora arenicola</i> (CNT-798)†  | 100        | Hawaii         | 2008                                     | 10        |
| 19 | n/a                 | <i>Salinispora arenicola</i> (CNH-713)†  | 100        | Red Sea        | 2004                                     |           |
| 20 | JN999727            | <i>Salinispora arenicola</i> (CNH-996)†  | 100        | Sea of Cortez  | 2001                                     |           |
| 21 | NZ_AXVS00000000     | <i>Salinispora arenicola</i> (CNR-425)†  | 100        | Guam           | 2002                                     |           |
| 22 | n/a                 | <i>Salinispora arenicola</i> (CNS-296)*† | 100        | Palau          | 2004                                     | 35        |
| 23 | NZ_JAEY00000000     | <i>Salinispora arenicola</i> (CNH-964)†  | 100        | Sea of Cortez  | 2000                                     |           |
| 24 | n/a                 | <i>Salinispora arenicola</i> (CNS-268)†  | 100        | Palau          | 2004                                     | 15        |
| 25 | HQ642848            | <i>Salinispora arenicola</i> (CNT-850)†  | 100        | Hawaii         | 2008                                     |           |
| 26 | KJ732897            | <i>Acinetobacter ursingii</i> (CUA-815)† | 100        | Akumal         | 20 23.425 N, 87 18.563 W                 | 17        |
| 27 | KJ732850            | <i>Alcanivorax</i> sp. (CUA-753)         | 99         | Cancun         | 21 14.334 N, 86 48.168 W                 | <1        |
| 28 | KJ732900            | <i>Alteromonas</i> sp. (CUA-818)         | 100        | BC (S)         | 18 24.373 N, 87 24.751 W                 | 10        |
| 29 | KJ732913            | <i>Alteromonas</i> sp. (CUA-848)†        | 99         | BC (N)         | 18 44.683 N, 87 20.936 W                 | 10        |
| 30 | KJ732878            | <i>Bacillus algicola</i> (CUA-790)†      | 100        | Miami          | 25 43.887 N, 80 09.718 W                 | <1        |

|    |          |                                              |     |              |                          |    |
|----|----------|----------------------------------------------|-----|--------------|--------------------------|----|
| 31 | KJ732882 | <i>Bacillus algicola</i> (CUA-796)           | 100 | Dry Tortugas | 24 39.075 N, 82 51.270 W | 25 |
| 32 | KJ732942 | <i>Bacillus algicola</i> (CUA-886)           | 100 | Dry Tortugas | 24 39.075 N, 82 51.270 W | 25 |
| 33 | KJ732885 | <i>Bacillus cereus</i> (CUA-799)             | 100 | Cozumel      | 20 30.917 N, 86 57.096 W | 10 |
| 34 | KJ732871 | <i>Bacillus gibsonii</i> (CUA-782)           | 100 | Miami        | 25 43.887 N, 80 09.718 W | <1 |
| 35 | KJ561455 | <i>Bacillus horikoshii</i> (CUA-749)         | 100 | Cozumel      | 20 30.917 N, 86 57.096 W | 10 |
| 36 | KJ732865 | <i>Bacillus pumilus</i> (CUA-775)            | 100 | Miami        | 20 30.917 N, 86 57.096 W | <1 |
| 37 | KJ732867 | <i>Bacillus pumilus</i> (CUA-778)            | 100 | Cozumel      | 18 33.860 N, 87 25.275 W | 10 |
| 38 | KJ732870 | <i>Bacillus pumilus</i> (CUA-781)            | 100 | BC (M)       | 21 10.262 N, 86 43.812 W | 12 |
| 39 | KJ732849 | <i>Bacillus</i> sp. (CUA-752)                | 100 | Cancun       | 25 43.887 N, 80 09.718 W | 12 |
| 40 | KJ732852 | <i>Bacillus</i> sp. (CUA-755)                | 99  | Miami        | 25 43.887 N, 80 09.718 W | <1 |
| 41 | KJ732860 | <i>Bacillus</i> sp. (CUA-770)                | 99  | Miami        | 25 43.887 N, 80 09.718 W | <1 |
| 42 | KJ732868 | <i>Bacillus</i> sp. (CUA-779)†               | 100 | Dry Tortugas | 24 39.075 N, 82 51.270 W | 25 |
| 43 | KJ732872 | <i>Bacillus</i> sp. (CUA-783)                | 100 | Miami        | 25 43.887 N, 80 09.718 W | <1 |
| 44 | KJ732876 | <i>Bacillus</i> sp. (CUA-788)                | 100 | Miami        | 25 43.887 N, 80 09.718 W | <1 |
| 45 | KJ732883 | <i>Bacillus</i> sp. (CUA-797)†               | 100 | Dry Tortugas | 24 39.075 N, 82 51.270 W | 25 |
| 46 | KJ732899 | <i>Bacillus</i> sp. (CUA-817)                | 100 | BC (S)       | 18 24.373 N, 87 24.751 W | 10 |
| 47 | KJ732901 | <i>Bacillus</i> sp. (CUA-821)                | 99  | BC (S)       | 18 24.373 N, 87 24.751 W | 10 |
| 48 | KJ732902 | <i>Bacillus</i> sp. (CUA-822)                | 99  | BC (S)       | 18 24.373 N, 87 24.751 W | 10 |
| 49 | KJ732908 | <i>Bacillus</i> sp. (CUA-830)                | 100 | BC (S)       | 18 24.373 N, 87 24.751 W | 10 |
| 50 | KJ732916 | <i>Bacillus</i> sp. (CUA-851)                | 100 | Cozumel      | 20 30.917 N, 86 57.096 W | 10 |
| 51 | KJ732922 | <i>Bacillus</i> sp. (CUA-858)                | 100 | BC (S)       | 18 24.373 N, 87 24.751 W | 10 |
| 52 | KJ732934 | <i>Bacillus</i> sp. (CUA-878)                | 100 | Dry Tortugas | 24 36.977 N, 82 56.797 W | 15 |
| 53 | KJ732937 | <i>Bacillus</i> sp. (CUA-881)†               | 100 | Cozumel      | 20 30.917 N, 86 57.096 W | 10 |
| 54 | KJ732940 | <i>Bacillus</i> sp. (CUA-884)                | 99  | Dry Tortugas | 24 36.977 N, 82 56.797 W | 15 |
| 55 | KJ732947 | <i>Bacillus</i> sp. (CUA-891)                | 100 | BC (M)       | 18 33.860 N, 87 25.275 W | 12 |
| 56 | KJ732953 | <i>Bacillus</i> sp. (CUA-897)†               | 100 | Cancun       | 21 14.334 N, 86 48.168 W | <1 |
| 57 | KJ732956 | <i>Bacillus</i> sp. (CUA-900)                | 100 | BC (S)       | 18 24.373 N, 87 24.751 W | 10 |
| 58 | KJ732961 | <i>Bacillus</i> sp. (CUA-905)                | 100 | Cancun       | 21 13.701 N, 86 45.867 W | 6  |
| 59 | KJ732963 | <i>Bacillus</i> sp. (CUA-907)                | 100 | BC (N)       | 18 44.683 N, 87 20.936 W | 10 |
| 60 | KJ732973 | <i>Bacillus</i> sp. (CUA-917)                | 100 | BC (S)       | 18 24.373 N, 87 24.751 W | 10 |
| 61 | KJ732904 | <i>Bacillus thuringiensis</i> (CUA-825)†     | 100 | BC (S)       | 18 24.373 N, 87 24.751 W | 10 |
| 62 | KJ732943 | <i>Brevibacterium epidermidis</i> (CUA-887)† | 100 | BC (S)       | 18 24.373 N, 87 24.751 W | 10 |
| 63 | KJ732955 | <i>Caulobacter</i> sp. (CUA-899)†            | 99  | Cozumel      | 20 19.479 N, 87 01.627 W | 15 |
| 64 | KJ732930 | <i>Cellulosimicrobium</i> sp. (CUA-872)      | 99  | BC (M)       | 18 33.860 N, 87 25.275 W | 12 |
| 65 | KJ732950 | <i>Cellulosimicrobium</i> sp. (CUA-894)      | 99  | Miami        | 25 43.887 N, 80 09.718 W | <1 |
| 66 | KJ732952 | <i>Cellulosimicrobium</i> sp. (CUA-896)      | 99  | Miami        | 25 43.887 N, 80 09.718 W | <1 |

|     |          |                                              |     |              |                          |    |
|-----|----------|----------------------------------------------|-----|--------------|--------------------------|----|
| 67  | KJ732894 | <i>Erythrobacter citreus</i> (CUA-812)       | 100 | Miami        | 25 43.887 N, 80 09.718 W | <1 |
| 68  | KJ732962 | <i>Erythrobacter citreus</i> (CUA-906)       | 100 | BC (N)       | 18 44.683 N, 87 20.936 W | 6  |
| 69  | KJ732925 | <i>Erythrobacter flavus</i> (CUA-862)†       | 100 | Akumal       | 20 23.425 N, 87 18.563 W | 17 |
| 70  | KJ732928 | <i>Erythrobacter flavus</i> (CUA-870)        | 100 | BC (N)       | 18 44.683 N, 87 20.936 W | 10 |
| 71  | KJ732929 | <i>Erythrobacter pelagi</i> (CUA-871)        | 100 | Cancun       | 21 13.701 N, 86 45.867 W | 6  |
| 72  | KJ732944 | <i>Erythrobacter pelagi</i> (CUA-888)        | 100 | Akumal       | 20 23.425 N, 87 18.563 W | 17 |
| 73  | KJ732866 | <i>Erythrobacter</i> sp. (CUA-777)           | 99  | BC (N)       | 18 44.683 N, 87 20.936 W | 10 |
| 74  | KJ732879 | <i>Erythrobacter</i> sp. (CUA-791)           | 99  | BC (N)       | 18 44.683 N, 87 20.936 W | 10 |
| 75  | KJ732970 | <i>Erythrobacter</i> sp. (CUA-914)           | 99  | Cancun       | 21 13.701 N, 86 45.867 W | 6  |
| 76  | KJ732919 | <i>Erythrobacter vulgaris</i> (CUA-855)      | 100 | BC (N)       | 18 44.683 N, 87 20.936 W | 10 |
| 77  | KJ732951 | <i>Erythrobacter vulgaris</i> (CUA-895)      | 100 | BC (S)       | 18 24.373 N, 87 24.751 W | 10 |
| 78  | KJ732923 | <i>Fabibacter</i> sp. (CUA-859)              | 99  | Akumal       | 20 23.425 N, 87 18.563 W | 17 |
| 79  | KJ732881 | <i>Gordonia</i> sp. (CUA-794)†               | 99  | Akumal       | 20 23.425 N, 87 18.563 W | 17 |
| 80  | KJ732889 | <i>Gordonia</i> sp. (CUA-805)                | 99  | Dry Tortugas | 24 39.075 N, 82 51.270 W | 25 |
| 81  | KJ732898 | <i>Gordonia</i> sp. (CUA-816)                | 99  | Cozumel      | 20 30.917 N, 86 57.096 W | 10 |
| 82  | KJ732893 | <i>Halobacillus kuroshimensis</i> (CUA-810)† | 100 | Cozumel      | 20 19.479 N, 87 01.627 W | 15 |
| 83  | KJ732857 | <i>Kytococcus sedentarius</i> (CUA-766)      | 100 | Dry Tortugas | 24 39.075 N, 82 51.270 W | 25 |
| 84  | KJ732936 | <i>Kytococcus sedentarius</i> (CUA-880)      | 100 | Cozumel      | 20 30.917 N, 86 57.096 W | 10 |
| 85  | KJ732957 | <i>Kytococcus sedentarius</i> (CUA-901)      | 100 | BC (S)       | 18 24.373 N, 87 24.751 W | 10 |
| 86  | KJ732892 | <i>Labrenzia</i> sp. (CUA-809)               | 99  | BC (S)       | 18 24.373 N, 87 24.751 W | 10 |
| 87  | KJ732948 | <i>Labrenzia</i> sp. (CUA-892)†              | 99  | BC (S)       | 18 24.373 N, 87 24.751 W | 10 |
| 88  | KJ732874 | <i>Loktanella pyoseonensis</i> (CUA-786)     | 100 | Miami        | 25 43.887 N, 80 09.718 W | <1 |
| 89  | KJ732888 | <i>Loktanella</i> sp. (CUA-804)†             | 99  | Cancun       | 21 14.334 N, 86 48.168 W | <1 |
| 90  | KJ732862 | <i>Methylococcus</i> sp. (CUA-772)†          | 100 | Miami        | 25 43.887 N, 80 09.718 W | <1 |
| 91  | KJ732967 | <i>Methylobacterium</i> sp. (CUA-911)†       | 100 | Dry Tortugas | 24 36.977 N, 82 56.797 W | 15 |
| 92  | KJ732945 | <i>Microbacterium amylolyticum</i> (CUA-889) | 100 | BC (M)       | 18 33.860 N, 87 25.275 W | 12 |
| 93  | KJ732968 | <i>Microbacterium oleivorans</i> (CUA-912)†  | 100 | Dry Tortugas | 24 36.977 N, 82 56.797 W | 15 |
| 94  | KJ732918 | <i>Microbacterium resistens</i> (CUA-854)†   | 100 | BC (S)       | 18 24.373 N, 87 24.751 W | 10 |
| 95  | KJ732926 | <i>Microbacterium</i> sp. (CUA-868)†         | 100 | Akumal       | 20 23.425 N, 87 18.563 W | 17 |
| 96  | KJ732949 | <i>Microbacterium</i> sp. (CUA-893)          | 99  | Miami        | 25 43.887 N, 80 09.718 W | <1 |
| 97  | KJ732847 | <i>Microbulbifer</i> sp. (CUA-750)†          | 99  | Cancun       | 21 14.334 N, 86 48.168 W | <1 |
| 98  | KJ732861 | <i>Microbulbifer</i> sp. (CUA-771)†          | 99  | Cancun       | 21 14.334 N, 86 48.168 W | <1 |
| 99  | KJ732875 | <i>Microbulbifer</i> sp. (CUA-787)           | 99  | Cancun       | 21 14.334 N, 86 48.168 W | <1 |
| 100 | KJ732891 | <i>Microbulbifer</i> sp. (CUA-808)           | 99  | Dry Tortugas | 24 39.075 N, 82 51.270 W | 25 |
| 101 | KJ732924 | <i>Microbulbifer</i> sp. (CUA-860)           | 99  | Cancun       | 21 13.701 N, 86 45.867 W | 6  |
| 102 | KJ732960 | <i>Microbulbifer</i> sp. (CUA-904)           | 100 | Cancun       | 21 13.701 N, 86 45.867 W | 6  |

|     |          |                                                |     |              |                          |    |
|-----|----------|------------------------------------------------|-----|--------------|--------------------------|----|
| 103 | KJ732969 | <i>Microbulbifer</i> sp. (CUA-913)             | 99  | Cozumel      | 20 19.479 N, 87 01.627 W | 15 |
| 104 | KJ732905 | <i>Micrococcus luteus</i> (CUA-826)†           | 100 | BC (M)       | 18 33.860 N, 87 25.275 W | 12 |
| 105 | KJ732896 | <i>Micrococcus</i> sp. (CUA-814)               | 99  | Dry Tortugas | 24 39.075 N, 82 51.270 W | 25 |
| 106 | KJ732935 | <i>Micrococcus</i> sp. (CUA-879)               | 99  | Dry Tortugas | 24 36.977 N, 82 56.797 W | 15 |
| 107 | KJ732941 | <i>Micrococcus</i> sp. (CUA-885)               | 99  | Dry Tortugas | 24 36.977 N, 82 56.797 W | 15 |
| 108 | KJ732887 | <i>Nocardioides marinisabuli</i> (CUA-802)     | 100 | Miami        | 25 43.887 N, 80 09.718 W | <1 |
| 109 | KJ732859 | <i>Ochrobactrum anthropi</i> (CUA-769)         | 100 | Dry Tortugas | 24 36.977 N, 82 56.797 W | 15 |
| 110 | KJ732958 | <i>Ochrobactrum</i> sp. (CUA-902)              | 100 | Cancun       | 21 10.262 N, 86 43.812 W | 12 |
| 111 | KJ732959 | <i>Ochrobactrum</i> sp. (CUA-903)              | 99  | Cancun       | 21 10.262 N, 86 43.812 W | 12 |
| 112 | KJ732939 | <i>Paracoccus homiensis</i> (CUA-883)          | 100 | Cozumel      | 20 30.917 N, 86 57.096 W | 10 |
| 113 | KJ732914 | <i>Paracoccus zeaxanthinifaciens</i> (CUA-849) | 100 | Miami        | 25 43.887 N, 80 09.718 W | <1 |
| 114 | KJ732855 | <i>Prauserella</i> sp. (CUA-763)†              | 99  | BC (N)       | 18 44.683 N, 87 20.936 W | 10 |
| 115 | KJ732873 | <i>Pseudoalteromonas piscicida</i> (CUA-785)   | 100 | BC (S)       | 18 24.373 N, 87 24.751 W | 10 |
| 116 | KJ732932 | <i>Pseudoalteromonas rubra</i> (CUA-876)       | 100 | BC (S)       | 18 24.373 N, 87 24.751 W | 10 |
| 117 | KJ732848 | <i>Pseudoalteromonas</i> sp. (CUA-751)†        | 99  | Cancun       | 21 10.262 N, 86 43.812 W | 12 |
| 118 | KJ732911 | <i>Pseudoalteromonas</i> sp. (CUA-846)†        | 99  | Cozumel      | 20 30.917 N, 86 57.096 W | 10 |
| 119 | KJ732954 | <i>Pseudoalteromonas</i> sp. (CUA-898)         | 100 | BC (M)       | 18 33.860 N, 87 25.275 W | 12 |
| 120 | KJ732966 | <i>Pseudoalteromonas</i> sp. (CUA-910)†        | 100 | Cozumel      | 20 30.917 N, 86 57.096 W | 10 |
| 121 | KJ732946 | <i>Pseudomonas aeruginosa</i> (CUA-890)        | 100 | BC (M)       | 18 33.860 N, 87 25.275 W | 12 |
| 122 | KJ732964 | <i>Pseudomonas</i> sp. (CUA-908)               | 100 | Cozumel      | 20 19.479 N, 87 01.627 W | 15 |
| 123 | KJ732851 | <i>Pseudoruegeria indica</i> (CUA-754)         | 100 | BC (M)       | 18 33.860 N, 87 25.275 W | 12 |
| 124 | KJ732920 | <i>Psychrobacter celer</i> (CUA-856)           | 100 | Akumal       | 20 23.425 N, 87 18.563 W | 17 |
| 125 | KJ732906 | <i>Psychrobacter</i> sp. (CUA-827)             | 99  | BC (M)       | 18 33.860 N, 87 25.275 W | 12 |
| 126 | KJ732912 | <i>Shimia</i> sp. (CUA-847)                    | 98  | BC (M)       | 18 33.860 N, 87 25.275 W | 12 |
| 127 | KJ732921 | <i>Silicibacter</i> sp. (CUA-857)              | 100 | Cancun       | 21 10.262 N, 86 43.812 W | 12 |
| 128 | KJ732890 | <i>Rhodococcus</i> sp. (CUA-806)               | 99  | Dry Tortugas | 24 39.299 N, 82 55.319 W | 25 |
| 129 | KJ732907 | <i>Ruegeria lacuscaerulensis</i> (CUA-829)     | 100 | BC (S)       | 18 24.373 N, 87 24.751 W | 10 |
| 130 | KJ732938 | <i>Ruegeria lacuscaerulensis</i> (CUA-882)     | 100 | Cozumel      | 20 30.917 N, 86 57.096 W | 10 |
| 131 | KJ732931 | <i>Serinicoccus</i> sp. (CUA-874)              | 99  | Akumal       | 20 23.425 N, 87 18.563 W | 17 |
| 132 | KJ732965 | <i>Staphylococcus cohnii</i> (CUA-909)         | 100 | BC (M)       | 18 33.860 N, 87 25.275 W | 12 |
| 133 | KJ732915 | <i>Staphylococcus pasteurii</i> (CUA-850)      | 100 | Miami        | 25 43.887 N, 80 09.718 W | <1 |
| 134 | KJ732917 | <i>Staphylococcus pasteurii</i> (CUA-852)      | 100 | Dry Tortugas | 24 39.075 N, 82 51.270 W | 25 |
| 135 | KJ732933 | <i>Staphylococcus</i> sp. (CUA-877)†           | 99  | Dry Tortugas | 24 40.165 N, 82 54.509 W | 20 |
| 136 | KJ732972 | <i>Streptomyces erythrogriseus</i> (CUA-916)†  | 100 | Miami        | 25 43.887 N, 80 09.718 W | <1 |
| 137 | KJ732869 | <i>Streptomyces globisporus</i> (CUA-780)      | 100 | Cancun       | 21 14.334 N, 86 48.168 W | <1 |
| 138 | KJ732884 | <i>Streptomyces globisporus</i> (CUA-798)      | 100 | Cancun       | 21 14.334 N, 86 48.168 W | <1 |

|     |          |                                          |     |         |                          |    |
|-----|----------|------------------------------------------|-----|---------|--------------------------|----|
| 139 | KJ732854 | <i>Streptomyces</i> sp. (CUA-762)        | 99  | Cancun  | 21 14.334 N, 86 48.168 W | <1 |
| 140 | KJ732856 | <i>Streptomyces</i> sp. (CUA-764)        | 100 | Cozumel | 20 19.479 N, 87 01.627 W | 15 |
| 141 | KJ732858 | <i>Streptomyces</i> sp. (CUA-768)†       | 100 | Cancun  | 21 14.334 N, 86 48.168 W | <1 |
| 142 | KJ732863 | <i>Streptomyces</i> sp. (CUA-773)        | 99  | Cancun  | 21 14.334 N, 86 48.168 W | <1 |
| 143 | KJ732864 | <i>Streptomyces</i> sp. (CUA-774)        | 100 | Cancun  | 21 14.334 N, 86 48.168 W | <1 |
| 144 | KJ732877 | <i>Streptomyces</i> sp. (CUA-789)        | 99  | Miami   | 25 43.887 N, 80 09.718 W | <1 |
| 145 | KJ732910 | <i>Streptomyces</i> sp. (CUA-845)        | 100 | Miami   | 25 43.887 N, 80 09.718 W | <1 |
| 146 | KJ732971 | <i>Streptomyces</i> sp. (CUA-915)        | 100 | Cancun  | 21 14.334 N, 86 48.168 W | <1 |
| 147 | KJ732886 | <i>Streptomyces variabilis</i> (CUA-801) | 100 | Miami   | 25 43.887 N, 80 09.718 W | <1 |
| 148 | KJ732880 | <i>Thalassobacillus</i> sp. (CUA-792)    | 99  | BC (M)  | 18 33.860 N, 87 25.275 W | 12 |
| 149 | KJ732853 | <i>Vibrio</i> sp. (CUA-759)              | 99  | BC (S)  | 18 24.373 N, 87 24.751 W | 10 |
| 150 | KJ732903 | <i>Vibrio</i> sp. (CUA-824)              | 100 | BC (S)  | 18 24.373 N, 87 24.751 W | 10 |
| 151 | KJ732909 | <i>Vibrio</i> sp. (CUA-833)              | 100 | BC (S)  | 18 24.373 N, 87 24.751 W | 10 |
| 152 | KJ732927 | <i>Vibrio</i> sp. (CUA-869)              | 100 | BC (S)  | 18 24.373 N, 87 24.751 W | 10 |

**Table S2.** Taxonomic classification of 127 environmental isolates to the genus level.

| Phylum           | Class/Subphylum     | Order               | Family                 | Genus              | # Strains      |   |
|------------------|---------------------|---------------------|------------------------|--------------------|----------------|---|
| Actinobacteria   | Actinobacteria      | Actinomycetales     | Streptomycetaceae      | Streptomyces       | 12             |   |
|                  |                     |                     | Pseudonocardiaceae     | Prauserella        | 1              |   |
|                  |                     |                     | Dermacoccaceae         | Kytococcus         | 3              |   |
|                  |                     |                     | Gordoniaceae           | Gordonia           | 3              |   |
|                  |                     |                     | Nocardiaceae           | Nocardioides       | 1              |   |
|                  |                     |                     |                        | Rhodococcus        | 1              |   |
|                  |                     |                     | Micrococcaceae         | Micrococcus        | 4              |   |
|                  |                     |                     | Microbacteriaceae      | Microbacterium     | 5              |   |
|                  |                     |                     | Promicromonosporaceae  | Cellulosimicrobium | 3              |   |
|                  |                     |                     | Intrasporangiaceae     | Serinicoccus       | 1              |   |
|                  | Brevibacteriaceae   | Brevibacterium      | 1                      |                    |                |   |
| Firmicutes       | Bacilli             | Bacillales          | Bacillaceae            | Bacillus           | 32             |   |
|                  |                     |                     |                        | Thalassobacillus   | 1              |   |
|                  |                     |                     |                        | Halobacillus       | 1              |   |
|                  |                     |                     |                        | Staphylococcaceae  | Staphylococcus | 4 |
| Proteobacteria   | Gammaproteobacteria | Alteromonadales     | Alteromonadaceae       | Microbulbifer      | 6              |   |
|                  |                     |                     |                        | Alteromonas        | 2              |   |
|                  |                     |                     | Pseudoalteromonadaceae | Pseudoalteromonas  | 6              |   |
|                  |                     | Oceanospirillales   | Alcanivoraceae         | Alcanivorax        | 1              |   |
|                  |                     | Vibrionales         | Vibrionaceae           | Vibrio             | 4              |   |
|                  |                     | Pseudomonadales     | Moraxellaceae          | Acinetobacter      | 1              |   |
|                  |                     | Pseudomonadales     |                        | Psychrobacter      | 2              |   |
|                  |                     |                     | Pseudomonadaceae       | Pseudomonas        | 2              |   |
|                  |                     | Alphaproteobacteria | Rhodobacterales        | Rhodobacteraceae   | Pseudoruegeria | 1 |
|                  |                     |                     |                        |                    | Rhodobacter    | 1 |
|                  | Methylarcula        |                     |                        |                    | 1              |   |
|                  | Paracoccus          |                     |                        |                    | 2              |   |
|                  | Loktanella          |                     |                        |                    | 2              |   |
|                  | Labrenzia           |                     |                        |                    | 2              |   |
|                  | Ruegeria            |                     |                        |                    | 3              |   |
|                  | Rhizobiales         | Brucellaceae        | Ochrobactrum           | 3                  |                |   |
|                  |                     | Methylobacteraceae  | Methylobacterium       | 1                  |                |   |
| Sphingomonadales | Erythrobacteraceae  | Erythrobacter       | 11                     |                    |                |   |
| Caulobacterales  | Caulobacteraceae    | Brevundimonas       | 1                      |                    |                |   |
|                  |                     | Caulobacter         | 1                      |                    |                |   |
| Bacteroidetes    | Cytophagia          | Cytophagales        | Flammeovirgaceae       | Fabibacter         | 1              |   |

**Table S3.** Number of secondary metabolite pathways in 24 *Salinispora* genomes, and presence/absence of known and putative siderophore pathways.

| Species             | Strain  | IMG Genome ID | NCBI Taxon ID | # Pathways | sid2 | des | sid3 | sid4 |
|---------------------|---------|---------------|---------------|------------|------|-----|------|------|
| <i>S. tropica</i>   | CNY-678 | 2561511109    | 1408358       | 21         | +    | +   | +    | +    |
| <i>S. tropica</i>   | CNY-681 | 2561511108    | 1408359       | 21         | +    | +   | +    | +    |
| <i>S. tropica</i>   | CNR-699 | 2518645624    | 1169198       | 26         | +    | +   | +    | +    |
| <i>S. tropica</i>   | CNH-898 | 2515154094    | 1137248       | 31         | +    | +   | +    | +    |
| <i>S. tropica</i>   | CNB-536 | 2517572212    | 1136431       | 27         | +    | +   | +    | +    |
| <i>S. tropica</i>   | CNS-197 | 2515154163    | 1137249       | 22         | +    | +   | +    | +    |
| <i>S. tropica</i>   | CNB-476 | 2517572211    | 1137247       | 20         | +    | +   | +    | +    |
| <i>S. tropica</i>   | CNS-416 | 2517572164    | 1169195       | 21         | +    | +   | +    | +    |
| <i>S. tropica</i>   | CNY-012 | 2540341192    | 1169197       | 22         | +    | +   | +    | +    |
| <i>S. tropica</i>   | CNT-261 | 2524614530    | 1288084       | 26         | +    | +   | +    | +    |
| <i>S. tropica</i>   | CNT-250 | 2540341193    | 1169196       | 21         | +    | +   | +    | +    |
| <i>S. tropica</i>   | CNB-440 | 640427140     | 369723        | 19         | +    | +   | +    | +    |
| <i>S. arenicola</i> | CNY-679 | 2561511113    | 1408342       | 32         | +    | +   | -    | -    |
| <i>S. arenicola</i> | CNY-685 | 2563366734    | 1408343       | 38         | +    | +   | -    | -    |
| <i>S. arenicola</i> | CNY-694 | 2561511114    | 1408345       | 33         | +    | +   | -    | -    |
| <i>S. arenicola</i> | CNS-205 | 641228504     | 391037        | 30         | +    | +   | -    | -    |
| <i>S. arenicola</i> | CNX-508 | 2515154188    | 1137257       | 26         | +    | +   | -    | -    |
| <i>S. arenicola</i> | CNT-005 | 2517572137    | 1137255       | 32         | +    | +   | -    | -    |
| <i>S. arenicola</i> | CNQ-748 | 2515154180    | 1144929       | 38         | +    | +   | -    | -    |
| <i>S. arenicola</i> | CNH-718 | 2561511105    | 1408328       | 31         | +    | +   | -    | -    |
| <i>S. arenicola</i> | CNH-646 | 2515154181    | 1136427       | 26         | +    | +   | -    | -    |
| <i>S. arenicola</i> | CNX-891 | 2515154187    | 1137258       | 27         | +    | +   | -    | -    |
| <i>S. arenicola</i> | CNS-296 | 2565956527    | 1408332       | 30         | +    | +   | -    | -    |
| <i>S. arenicola</i> | CNH-905 | 2515154183    | 1137251       | 33         | +    | +   | -    | -    |

**Table S4.** Primers used for 16S rRNA gene amplification.

| <b>Forward</b> | <b>Sequence</b>             | <b>Reverse</b> | <b>Sequence</b>                      | <b>Reference</b>     | <b>Strains (CUA-)</b>                                                        |
|----------------|-----------------------------|----------------|--------------------------------------|----------------------|------------------------------------------------------------------------------|
| FC27           | 5'-AGAGTTTGATCCTGGCTCAG-3'  | RC1492         | 5' TACGGCTACCTTGTTACGACTT 3'         | Mincer et al. 2005   | 779, 887, 903, 773, 780, 915, 916,<br>789, 798, 762, 768, 774, 801, 745, 764 |
| B341F          | 5'-CCTACGGGNGGCWGCAG-3'     | B785R          | 5'-GACTACHVGGGTATCTAATCC-3'          | Muyzer et al. 1993   | 785, 917, 876                                                                |
| TX9            | 5'-GGATTAGAWACCCBGGTAGTC-3' | 1391R          | 5'-CCTATCCCCTGTGTGCCTTGGCAGTCTCAG-3' | Patin et al. 2013    | 773, 797, 852, 813, 868                                                      |
| F27            | 5'-AGAGTTTGATCMTGGCTCA-3'   | 1492R          | 5' TACGGYTACCTTGTTACGACTT 3'         | Wilmotte et al. 1993 | All remaining strains                                                        |



**Table S5.** Genome coordinates for all confirmed and putative siderophore gene clusters.

| <b>Genome</b> | <b>Pathway</b> | <b>Start coordinate</b> | <b>End coordinate</b> | <b># Genes</b> |
|---------------|----------------|-------------------------|-----------------------|----------------|
| CNS-205       | des            | 3108596                 | 3126368               | 17             |
| CNS-205       | sid2           | 2370824                 | 2394313               | 12             |
| CNB-440       | des            | 2859946                 | 2876344               | 15             |
| CNB-440       | sid2           | 2969746                 | 2995806               | 15             |
| CNB-440       | sid3           | 3189087                 | 3218252               | 28             |
| CNB-440       | sid4           | 3218277                 | 3259013               | 29             |
