# Supplementary material
Source: PubMed Central journal article supplement (PMC4737938)

Figure S1

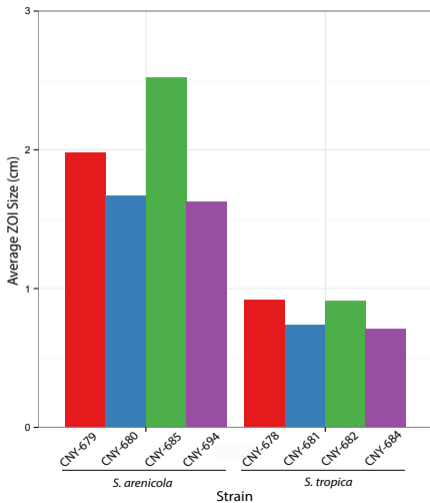

Figure S2

A. *S. arenicola*

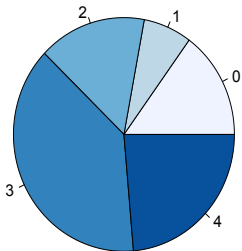

B. *S. tropica*

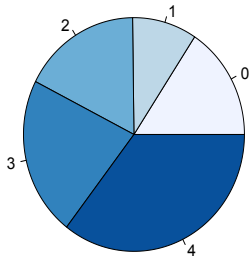

Figure S3

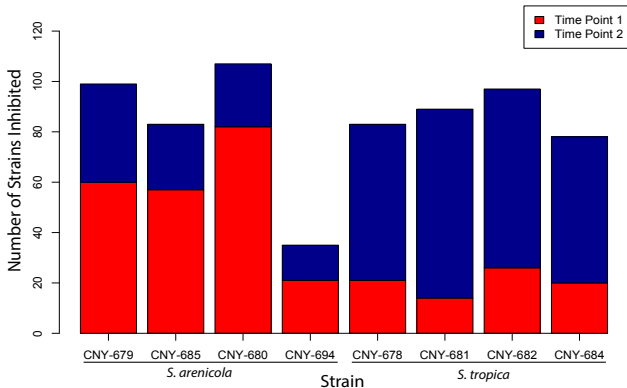

Figure S4

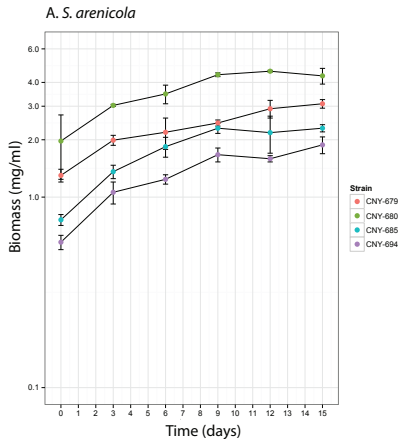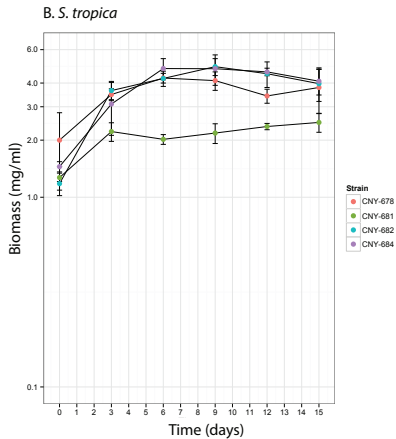

Figure S5

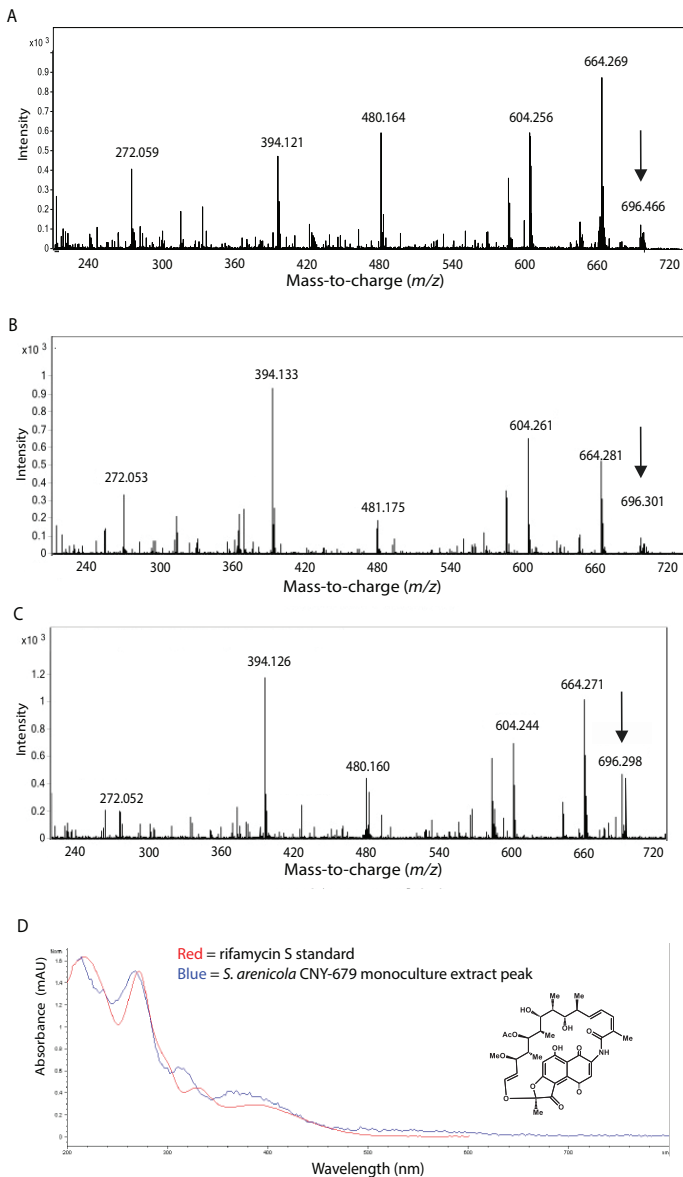

Supplement: ismej2015128x2.pdf [file ismej2015128x2.pdf]
